# Supplementary material for: The Sweetpotato Voltage-Gated K+ Channel β Subunit, KIbB1, Positively Regulates Low-K+ and High-Salinity Tolerance by Maintaining Ion Homeostasis
Source: MDPI journal article supplement (doi:10.3390/genes13061100), 2022-06-20
Supplement: s1 [file s1]

**Table S1.** Primers used in this study

| Primer name   | Primer ssequence (5'→3')         |
|---------------|----------------------------------|
| IbActin-F:    | AGCAGCATGAAGATTAAGGTTGTAGCAC     |
| IbActin-R:    | TGGAAAATTAGAAGCACTTCCTGTGAAC     |
| KIbB1-qPCR-F: | ACCCGATAGTAGGTTTGCAC             |
| KIbB1-qPCR-R: | AATCTGGGCGCTTTGG                 |
| KIbB1-SacI-F: | CGAGCTCATGGATTATGTGGACTTGATCTACT |
| KIbB1-XbaI-R: | GCTCTAGAGCGATAAGAATCTGGGCGC      |
| KIbB1-T-F:    | GGTCGCGGAGGCTATGGATGC            |
| KIbB1-T-R:    | GCTTCTGCGGGCGATTTGTGT            |
| Atactin-F     | GCACCCTGTTCTTCTTACCGA            |
| Atactin-R     | AGTAAGGTCACGTCCAGCAAGG           |
| AtCAT-F       | GCAACTACCCCGAGTGGAAG             |
| AtCAT-R       | TGTTTCAGAACCAAGCGACCA            |
| AtGPX8-F      | ATGGCGACGAAGGAACCAG              |
| AtGPX8-R      | ATCGCCGAAGATTCCTCCATT            |
| AtP5CS-F      | ATGATCTTATTTATGTTCTGC            |
| AtP5CS-R      | CACTATCTTCCGTCCTAT               |
| AtP5CR-F      | AGTTTAGCTTCACAGACCGTTC           |
| AtP5CR-R      | GCTCTGTGAGAGCTCGCGGCTTC          |
| AtDHAR-F      | ATGGTCCTTTTATCGCCGGG             |
| AtDHAR-R      | GCCCATCCAGAGATCACACA             |
| AtAPX-F       | CTCTGGGACGATGCCACAAG             |
| AtAPX-R       | CTCGACCAAAGGACGGAAAA             |
| AtPOD-F       | TCCGGGAGCCACACCATTGG             |
| AtPOD-R       | TGGTCGGAATTCAACAG                |
| AtSOD-F       | ATGAGAAGTTCTATGAAGAG             |
| AtSOD-R       | GTCTTTATGTAATCTGGT               |

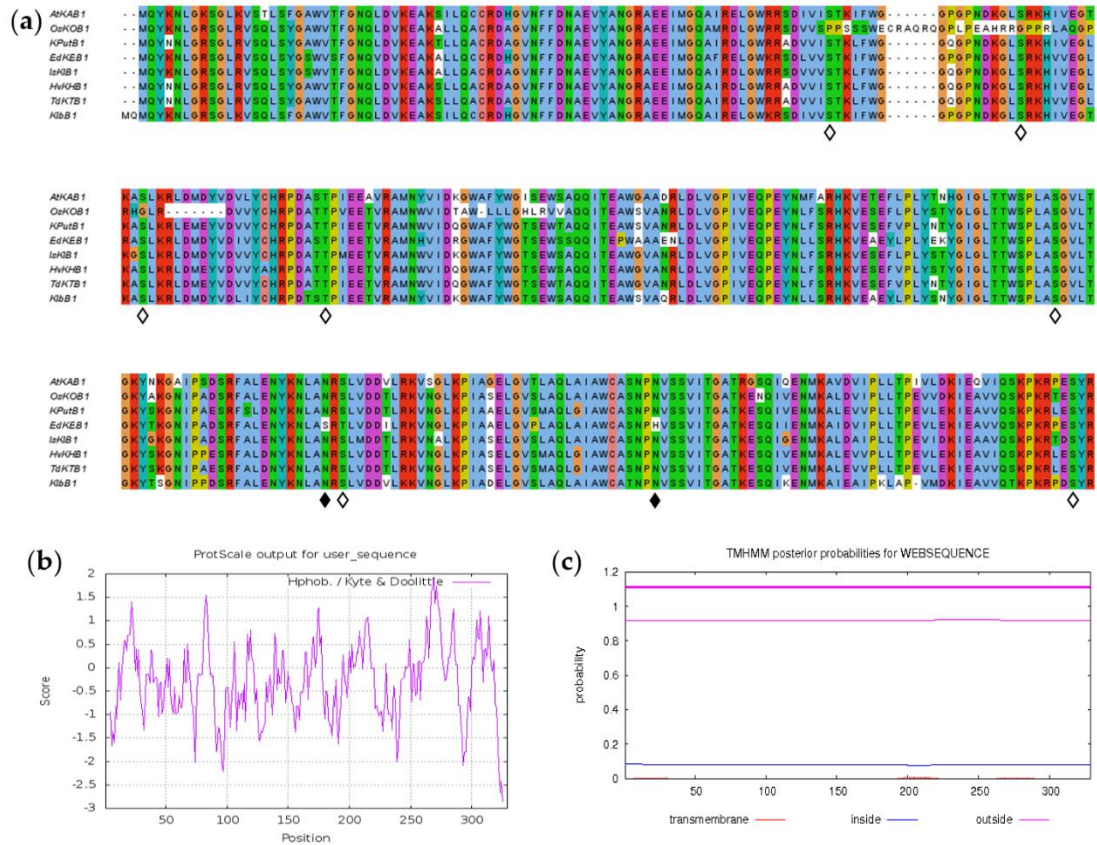

**Figure S1.** Amino acid sequence analysis of KibB1. (a) Multiple amino acid sequence alignment of KibB1 with homologs from NCBI. (b) The polarity prediction of KibB1. The positive value indicated hydrophobicity and the negative value indicated hydrophilicity. (c) Transmembrane domain prediction of KibB1.

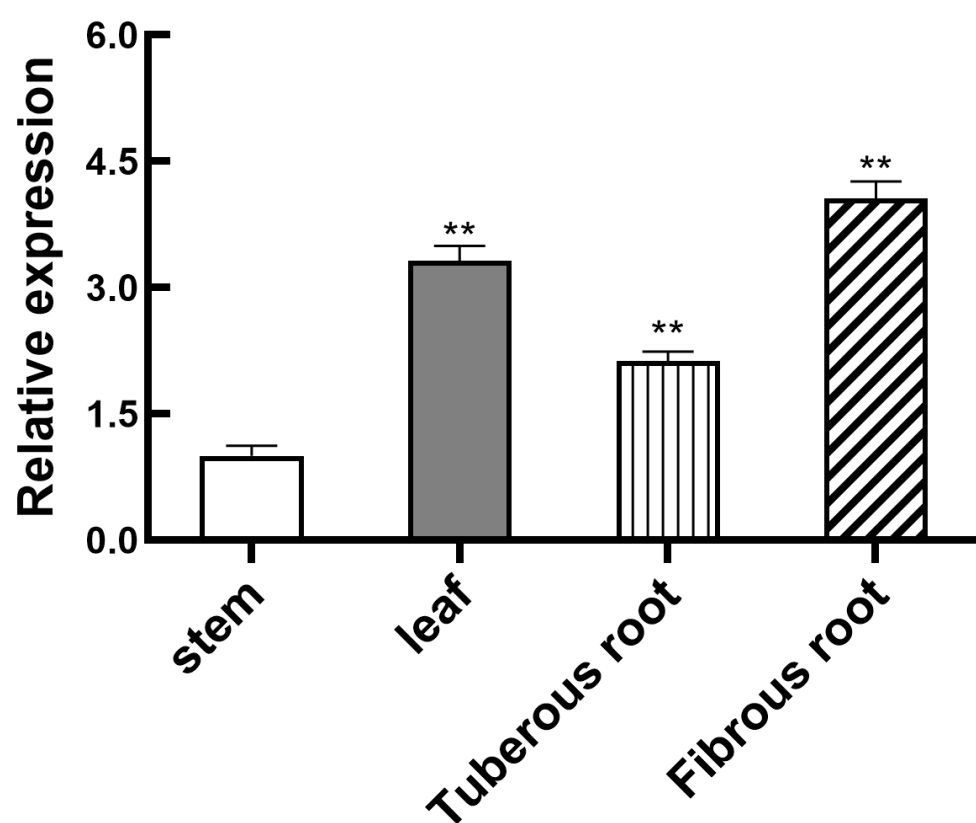

**Figure. S2** Expression analysis of *KlbB1* in different tissues. Data are presented as means  $\pm$  SE (n = 3). \*\* indicated a significant difference at  $p < 0.01$ .

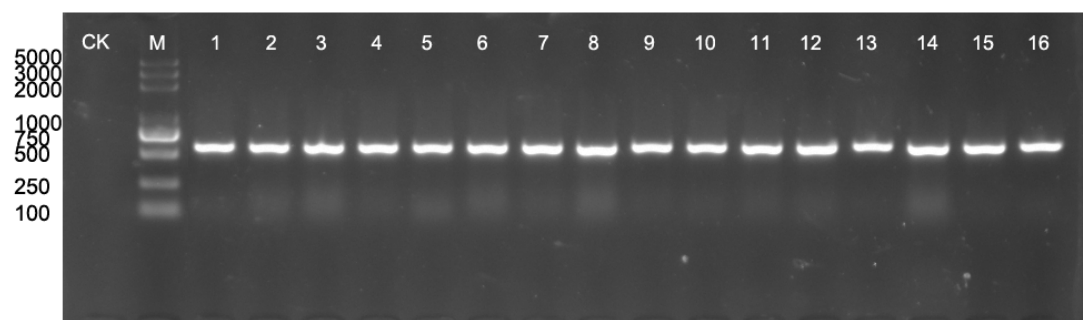

**Figure S3.** PCR identification of *KlbB1* transgenic plants. M, DNA marker; CK, negative control; 1-16, candidate transgenic plants.
